# Supplementary material for: Monitoring of Soil Nutrient Levels by an EC Sensor during Spring Onion (Allium fistulosum) Cultivation under Different Fertilizer Treatments
Source: MDPI journal article supplement (doi:10.3390/agronomy13082156), 2023-08-17
Supplement: s1 [file s1]

## Supplementary Materials

**Supplementary Figure S1.** Location map of the experimental site, atmospheric temperature, and precipitation during spring onion cultivation.

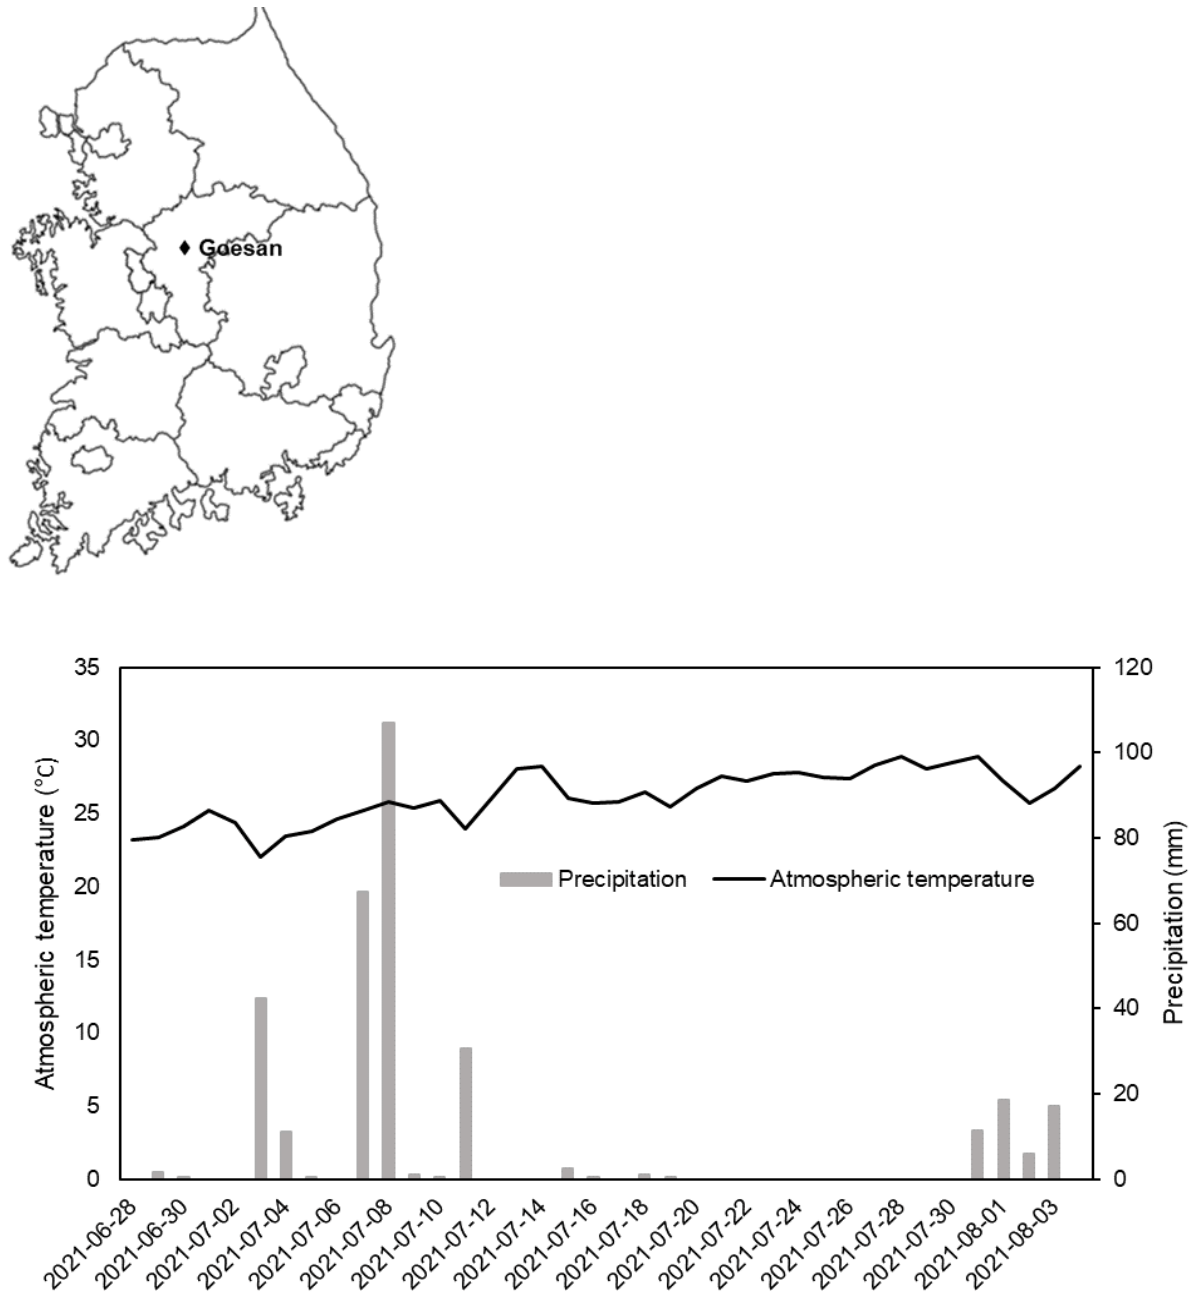

**Supplementary Table S1.** Amount of applied fertilizer for different spring onion cultivation plots.

| Fertilizer treatment            | Amount of fertilizer<br>(N-P <sub>2</sub> O <sub>5</sub> -K <sub>2</sub> O, kg/10a) |                        |
|---------------------------------|-------------------------------------------------------------------------------------|------------------------|
|                                 | Basal fertilizer                                                                    | Additional fertigation |
| Inorganic fertilizer (N70, K60) | 4.6-3.0-5.5                                                                         | 12.2-11.0              |
| Organic fertilizer (N70, K60)   | 4.6-3.0-5.5                                                                         | 10.6-8.2               |
| Compost (N70, K60)              | 4.6-3.0-5.5                                                                         | 10.6-8.2               |
| Inorganic fertilizer (N80, K80) | 3.0-3.0-2.7                                                                         | 12.2-11.0              |
| Organic fertilizer (N80, K80)   | 3.0-3.0-2.7                                                                         | 12.2-11.0              |
| Compost (N80, K80)              | 3.0-3.0-2.7                                                                         | 12.2-11.0              |

**Supplementary Table S2.** pH, EC, and water-soluble element concentrations (cmol<sub>e</sub>/kg) of different fertilizer-applied soils.

| Fertilizer treatments |                                 | pH   | EC<br>(dS/m) | Ca   | K    | Mg   | Na   | P    | S    | NO <sub>3</sub> -<br>N |
|-----------------------|---------------------------------|------|--------------|------|------|------|------|------|------|------------------------|
| 66<br>DA<br>T         | Inorganic fertilizer (N70, K60) | 6.06 | 0.87         | 1.11 | 0.47 | 0.72 | 0.38 | 0.14 | 0.47 | 0.64                   |
|                       | Organic fertilizer (N70, K60)   | 5.97 | 0.55         | 0.86 | 0.23 | 0.59 | 0.12 | 0.21 | 0.72 | 0.39                   |
|                       | Compost (N70, K60)              | 6.16 | 0.38         | 0.36 | 0.32 | 0.29 | 0.15 | 0.18 | 0.32 | 0.28                   |
|                       | Inorganic fertilizer (N80, K80) | 5.53 | 1.63         | 2.25 | 0.66 | 1.69 | 0.43 | 0.08 | 1.01 | 1.33                   |
|                       | Organic fertilizer (N80, K80)   | 4.84 | 0.75         | 0.96 | 0.49 | 0.97 | 0.21 | 0.14 | 0.74 | 0.54                   |
|                       | Compost (N80, K80)              | 5.64 | 0.35         | 0.44 | 0.13 | 0.48 | 0.14 | 0.15 | 0.34 | 0.26                   |
| 102<br>DA<br>T        | Inorganic fertilizer (N70, K60) | 6.16 | 0.26         | 0.34 | 0.75 | 0.19 | 0.15 | 0.15 | 0.10 | 0.20                   |
|                       | Organic fertilizer (N70, K60)   | 6.45 | 0.06         | 0.07 | 0.17 | 0.03 | 0.04 | 0.14 | 0.01 | 0.10                   |
|                       | Compost (N70, K60)              | 5.96 | 0.13         | 0.24 | 0.36 | 0.11 | 0.12 | 0.15 | 0.09 | 0.18                   |
|                       | Inorganic fertilizer (N80, K80) | 5.37 | 0.39         | 0.96 | 0.59 | 0.59 | 0.26 | 0.09 | 0.29 | 0.78                   |
|                       | Organic fertilizer (N80, K80)   | 6.14 | 0.08         | 0.12 | 0.25 | 0.08 | 0.06 | 0.16 | 0.04 | 0.10                   |
|                       | Compost (N80, K80)              | 5.69 | 0.13         | 0.25 | 0.27 | 0.15 | 0.13 | 0.16 | 0.09 | 0.17                   |

**Supplementary Table S3.** Exchangeable ammonium and ammonium acetate extractable element concentrations (cmol<sub>c</sub>/kg).

| Sampling date | Fertilizer treatments           | NH <sub>4</sub> -N | Ca   | K    | Mg   | Na   |
|---------------|---------------------------------|--------------------|------|------|------|------|
| 66 DAT        | Inorganic fertilizer (N70, K60) | 0.10               | 3.65 | 0.77 | 1.93 | 0.22 |
|               | Organic fertilizer (N70, K60)   | 0.17               | 2.70 | 0.43 | 1.74 | 0.06 |
|               | Compost (N70, K60)              | 0.06               | 3.11 | 0.86 | 1.82 | 0.10 |
|               | Inorganic fertilizer (N80, K80) | 0.25               | 3.04 | 0.79 | 2.07 | 0.19 |
|               | Organic fertilizer (N80, K80)   | 0.16               | 3.57 | 1.19 | 1.34 | 0.18 |
|               | Compost (N80, K80)              | 0.06               | 2.53 | 0.39 | 1.35 | 0.08 |
| 102 DAT       | Inorganic fertilizer (N70, K60) | 0.07               | 6.71 | 1.95 | 1.92 | 0.15 |
|               | Organic fertilizer (N70, K60)   | 0.07               | 5.79 | 1.36 | 1.49 | 0.03 |
|               | Compost (N70, K60)              | 0.10               | 5.80 | 1.91 | 1.43 | 0.12 |
|               | Inorganic fertilizer (N80, K80) | 0.10               | 5.83 | 1.97 | 2.21 | 0.24 |
|               | Organic fertilizer (N80, K80)   | 0.12               | 5.62 | 1.97 | 2.02 | 0.07 |
|               | Compost (N80, K80)              | 0.11               | 6.30 | 1.69 | 1.89 | 0.15 |
